# Supplementary material for: Where have I got to? Associations of age at marriage with marital household assets in educated and uneducated women in lowland Nepal
Source: PeerJ journal article supplement (doi:10.7717/peerj.17671), 2024-08-07

(a)

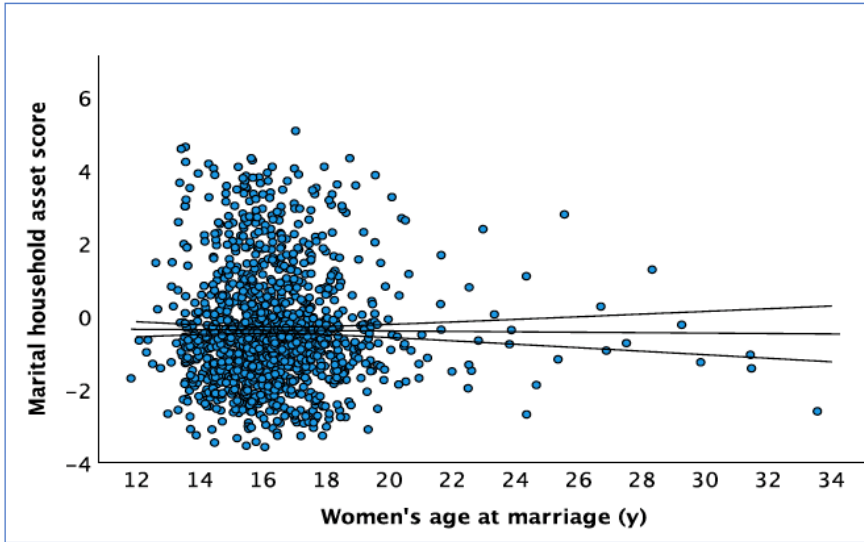

(b)

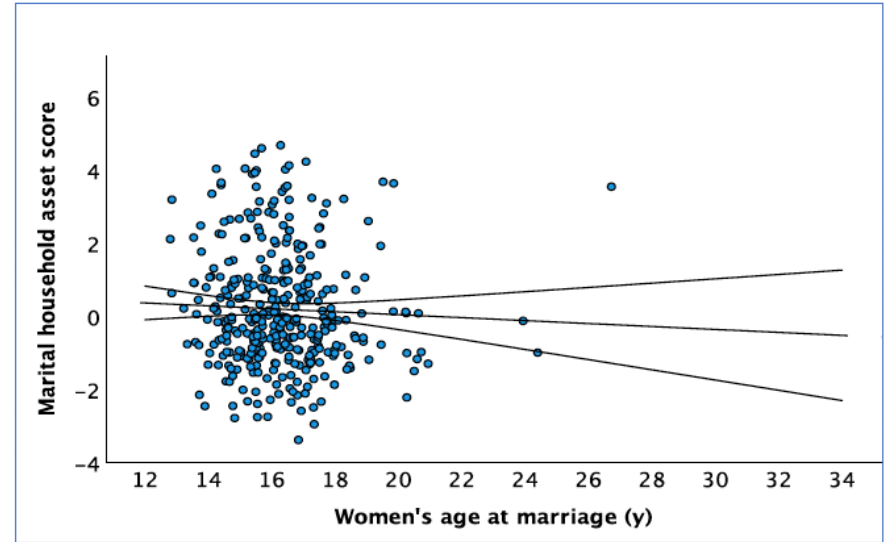

(c)

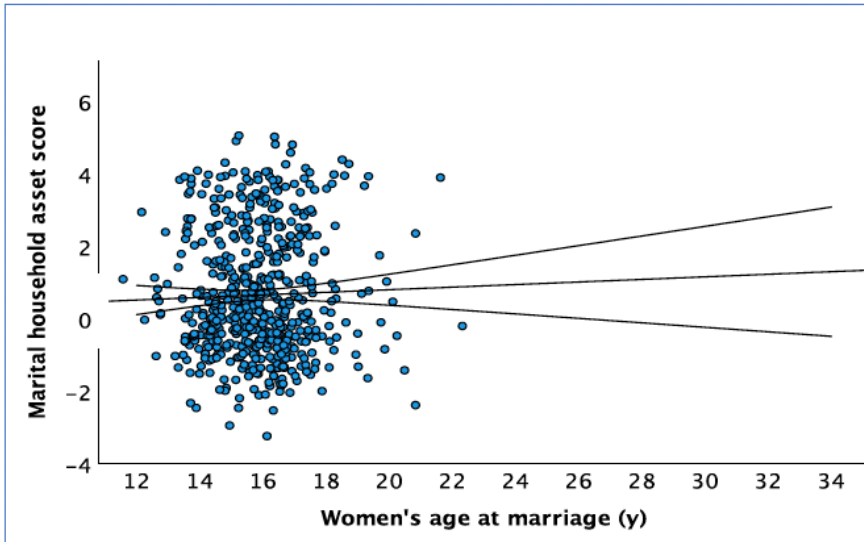

(d)

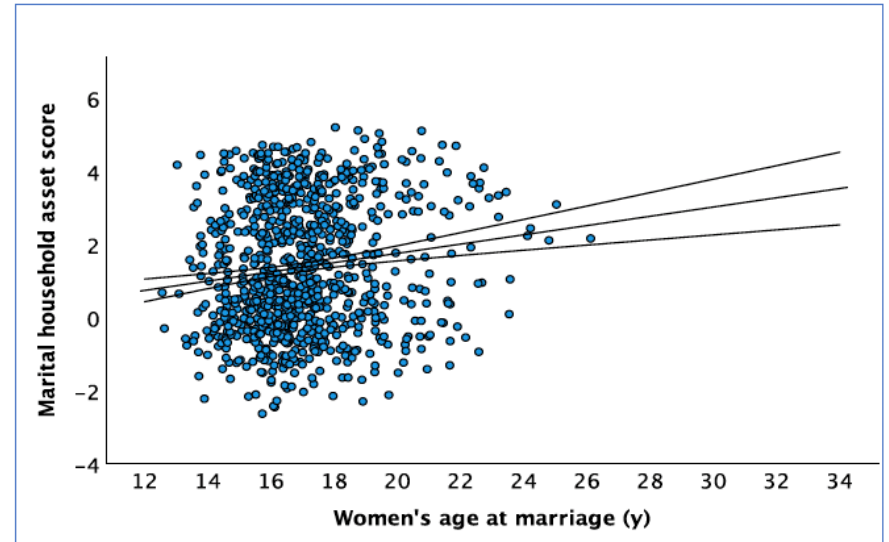

Supplement: Figure_S1_reformatted.pdf [file Figure_S1_reformatted.pdf]
