# Supplementary material for: Where have I got to? Associations of age at marriage with marital household assets in educated and uneducated women in lowland Nepal
Source: PeerJ journal article supplement (doi:10.7717/peerj.17671), 2024-08-07

Median assets by women's education level and marriage age

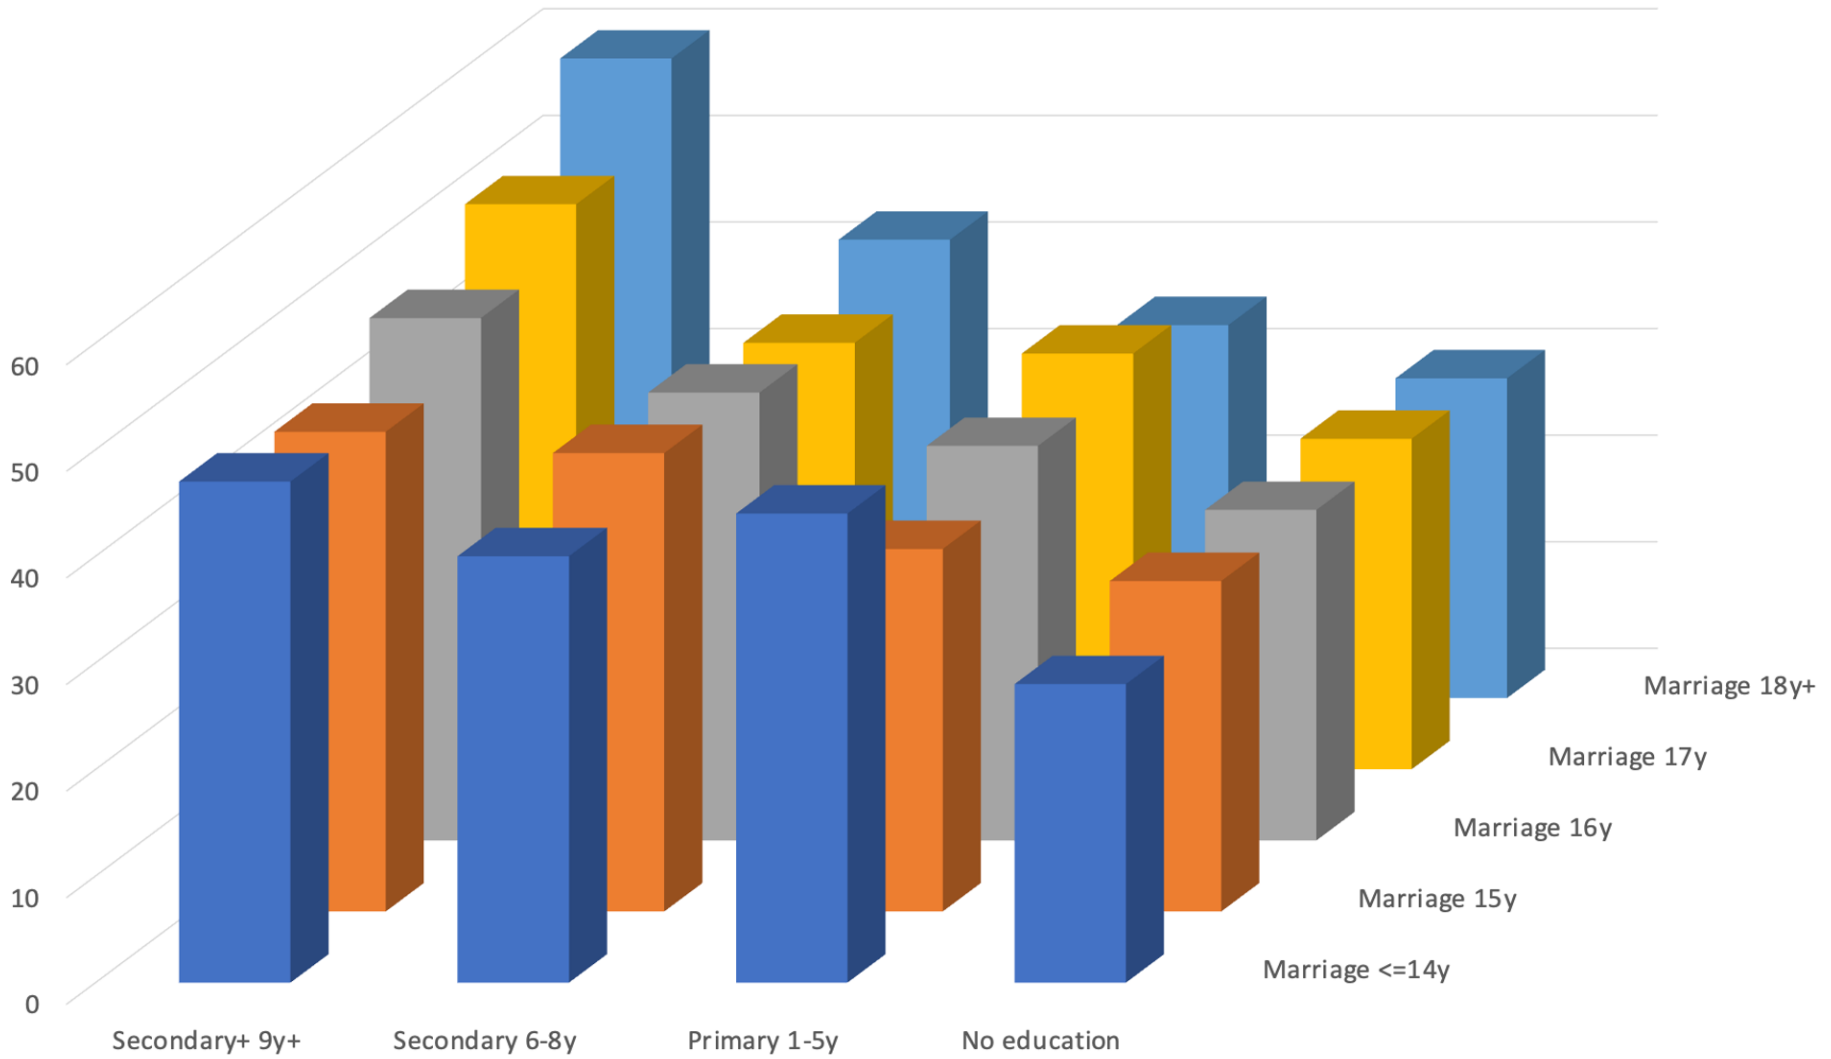

Supplement: New_Figure_S2_reformatted.pdf [file New_Figure_S2_reformatted.pdf]
